# Supplementary material for: Causal Link between Inflammatory Bowel Disease and Fistula: Evidence from Mendelian Randomization Study
Source: MDPI journal article supplement (doi:10.3390/jcm12072482), 2023-03-24
Supplement: s1 [file s1]

| Variable        | Outcome                   |      |                     |        |                          |                       |           |
|-----------------|---------------------------|------|---------------------|--------|--------------------------|-----------------------|-----------|
|                 | Method                    | NSNP | OR (95% CI)         | P_val  | Heterogeneity<br>p-value | Pleiotropy<br>p-value | Mr_presso |
| FISTULA to IBD  | MR Egger                  | 20   | 0.96 (0.89 to 1.03) | 0.2302 | 0.5646                   | 0.2794                | 0.5457    |
|                 | Weighted median           | 20   | 0.97 (0.91 to 1.03) | 0.3389 |                          |                       |           |
|                 | Inverse variance weighted | 20   | 0.99 (0.94 to 1.03) | 0.5482 |                          |                       |           |
| FISTULA to CD   | MR Egger                  | 19   | 0.98 (0.89 to 1.08) | 0.6737 | 0.6604                   | 0.5133                | 0.8021    |
|                 | Weighted median           | 19   | 0.97 (0.89 to 1.05) | 0.4059 |                          |                       |           |
|                 | Inverse variance weighted | 19   | 0.99 (0.94 to 1.05) | 0.8615 |                          |                       |           |
| FISTULA to UC   | MR Egger                  | 20   | 0.95 (0.87 to 1.04) | 0.2695 | 0.6733                   | 0.8506                | 0.7232    |
|                 | Weighted median           | 20   | 0.95 (0.88 to 1.03) | 0.2297 |                          |                       |           |
|                 | Inverse variance weighted | 20   | 0.97 (0.92 to 1.03) | 0.3260 |                          |                       |           |
| FISSANAL to IBD | MR Egger                  | 15   | 0.96 (0.89 to 1.03) | 0.2983 | 0.3900                   | 0.7088                | 0.5064    |
|                 | Weighted median           | 15   | 0.95 (0.88 to 1.02) | 0.1513 |                          |                       |           |
|                 | Inverse variance weighted | 15   | 0.97 (0.92 to 1.02) | 0.2102 |                          |                       |           |
| FISSANAL to CD  | MR Egger                  | 15   | 0.98 (0.89 to 1.07) | 0.6232 | 0.6733                   | 0.8506                | 0.6559    |
|                 | Weighted median           | 15   | 0.97 (0.88 to 1.06) | 0.4925 |                          |                       |           |
|                 | Inverse variance weighted | 15   | 0.98 (0.92 to 1.04) | 0.5760 |                          |                       |           |
| FISSANAL to UC  |                           |      |                     |        |                          |                       |           |

|                        |                           |    |                     |        |        |        |        |
|------------------------|---------------------------|----|---------------------|--------|--------|--------|--------|
|                        | MR Egger                  | 15 | 0.94 (0.86 to 1.04) | 0.2413 | 0.6604 | 0.5133 | 0.8004 |
|                        | Weighted median           | 15 | 0.94 (0.86 to 1.03) | 0.1911 |        |        |        |
|                        | Inverse variance weighted | 15 | 0.95 (0.89 to 1.01) | 0.0959 |        |        |        |
| FEMGENFISTUL<br>to IBD |                           |    |                     |        |        |        |        |
|                        | MR Egger                  | 6  | 1.02 (0.99 to 1.06) | 0.2478 | 0.1441 | 0.4252 | 0.2246 |
|                        | Weighted median           | 6  | 1.01 (0.99 to 1.03) | 0.2888 |        |        |        |
|                        | Inverse variance weighted | 6  | 1.01 (0.99 to 1.03) | 0.2702 |        |        |        |
| FEMGENFISTUL<br>to CD  |                           |    |                     |        |        |        |        |
|                        | MR Egger                  | 6  | 1.03 (1.00 to 1.07) | 0.1295 | 0.1424 | 0.7641 | 0.6678 |
|                        | Weighted median           | 6  | 1.02 (1.00 to 1.05) | 0.1083 |        |        |        |
|                        | Inverse variance weighted | 6  | 1.02 (1.00 to 1.04) | 0.0348 |        |        |        |
| FEMGENFISTUL<br>to UC  |                           |    |                     |        |        |        |        |
|                        | MR Egger                  | 6  | 1.00 (0.96 to 1.05) | 0.9083 | 0.1424 |        | 0.2937 |
|                        | Weighted median           | 6  | 0.99 (0.96 to 1.02) | 0.5284 |        |        |        |
|                        | Inverse variance weighted | 6  | 1.00 (0.97 to 1.02) | 0.7949 |        |        |        |

---
