# Supplementary material for: Causal Link between Inflammatory Bowel Disease and Fistula: Evidence from Mendelian Randomization Study
Source: MDPI journal article supplement (doi:10.3390/jcm12072482), 2023-03-24
Supplement: s1 [file s1]

**Supplementary table S2. (1) SNPs related to IBD; (2) SNPs related to UC; (3) SNPs related to CD.**

| (1)              |             |               |              |       |        |     |           |         |
|------------------|-------------|---------------|--------------|-------|--------|-----|-----------|---------|
| ID               | SNP         | Effect_allele | Other_allele | Se    | Beta   | Chr | P_val     | F       |
| ebi-a-GCST004131 | rs12136659  | C             | T            | 0.014 | 0.087  | 1   | 1.02E-09  | 37.537  |
| ebi-a-GCST004131 | rs2488398   | C             | G            | 0.015 | 0.099  | 1   | 3.63E-11  | 43.702  |
| ebi-a-GCST004131 | rs10746475  | A             | T            | 0.016 | 0.131  | 1   | 1.58E-15  | 63.610  |
| ebi-a-GCST004131 | rs4654925   | C             | G            | 0.012 | -0.117 | 1   | 4.80E-21  | 89.333  |
| ebi-a-GCST004131 | rs112936798 | C             | A            | 0.033 | -0.184 | 1   | 2.89E-08  | 30.849  |
| ebi-a-GCST004131 | rs35730213  | C             | G            | 0.014 | -0.135 | 1   | 7.50E-22  | 92.434  |
| ebi-a-GCST004131 | rs3024493   | A             | C            | 0.017 | 0.191  | 1   | 4.04E-31  | 134.139 |
| ebi-a-GCST004131 | rs11209013  | G             | A            | 0.012 | 0.077  | 1   | 4.46E-10  | 38.861  |
| ebi-a-GCST004131 | rs11581607  | A             | G            | 0.029 | -0.658 | 1   | 4.59E-111 | 500.603 |
| ebi-a-GCST004131 | rs1336900   | A             | G            | 0.013 | -0.085 | 1   | 2.98E-11  | 43.891  |
| ebi-a-GCST004131 | rs10800309  | G             | A            | 0.013 | -0.123 | 1   | 1.94E-20  | 85.528  |
| ebi-a-GCST004131 | rs1268339   | C             | T            | 0.016 | 0.091  | 1   | 2.75E-08  | 30.963  |
| ebi-a-GCST004131 | rs1317209   | A             | G            | 0.016 | 0.116  | 1   | 3.79E-13  | 52.926  |
| ebi-a-GCST004131 | rs3820330   | A             | C            | 0.014 | -0.089 | 1   | 1.72E-10  | 40.595  |
| ebi-a-GCST004131 | rs4276914   | A             | G            | 0.013 | 0.078  | 1   | 3.15E-10  | 39.238  |
| ebi-a-GCST004131 | rs7532133   | G             | A            | 0.013 | 0.079  | 1   | 3.83E-09  | 34.669  |
| ebi-a-GCST004131 | rs11677002  | C             | T            | 0.013 | -0.093 | 2   | 1.37E-13  | 54.596  |
| ebi-a-GCST004131 | rs55946629  | A             | C            | 0.018 | 0.130  | 2   | 5.45E-13  | 52.000  |
| ebi-a-GCST004131 | rs4676408   | A             | G            | 0.013 | 0.101  | 2   | 7.63E-15  | 60.481  |
| ebi-a-GCST004131 | rs7608697   | C             | A            | 0.013 | 0.140  | 2   | 1.67E-28  | 122.577 |
| ebi-a-GCST004131 | rs13422838  | C             | T            | 0.021 | -0.114 | 2   | 2.56E-08  | 31.087  |

|                  |            |   |   |       |        |   |          |         |
|------------------|------------|---|---|-------|--------|---|----------|---------|
| ebi-a-GCST004131 | rs62180107 | C | G | 0.013 | -0.080 | 2 | 1.55E-09 | 36.456  |
| ebi-a-GCST004131 | rs3792111  | T | C | 0.012 | 0.139  | 2 | 5.12E-29 | 125.838 |
| ebi-a-GCST004131 | rs1558619  | T | G | 0.012 | -0.084 | 2 | 8.90E-12 | 46.973  |
| ebi-a-GCST004131 | rs76286777 | C | T | 0.015 | 0.100  | 2 | 4.65E-11 | 43.508  |
| ebi-a-GCST004131 | rs72852162 | C | A | 0.020 | -0.113 | 2 | 2.30E-08 | 31.238  |
| ebi-a-GCST004131 | rs6740847  | G | A | 0.013 | -0.092 | 2 | 1.22E-13 | 54.642  |
| ebi-a-GCST004131 | rs62183956 | T | C | 0.013 | -0.078 | 2 | 4.49E-10 | 38.938  |
| ebi-a-GCST004131 | rs1131095  | C | T | 0.013 | 0.164  | 3 | 1.22E-35 | 155.773 |
| ebi-a-GCST004131 | rs56116661 | T | C | 0.016 | -0.100 | 3 | 9.27E-10 | 37.638  |
| ebi-a-GCST004131 | rs77272631 | C | G | 0.042 | 0.229  | 3 | 3.72E-08 | 30.237  |
| ebi-a-GCST004131 | rs503734   | G | A | 0.012 | -0.069 | 3 | 2.67E-08 | 31.144  |
| ebi-a-GCST004131 | rs2593855  | T | C | 0.014 | -0.083 | 3 | 2.54E-09 | 35.318  |
| ebi-a-GCST004131 | rs11734570 | A | G | 0.013 | 0.069  | 4 | 4.80E-08 | 29.861  |
| ebi-a-GCST004131 | rs62324212 | A | C | 0.013 | 0.089  | 4 | 2.67E-12 | 48.670  |
| ebi-a-GCST004131 | rs4957256  | T | C | 0.016 | -0.118 | 5 | 3.37E-14 | 57.858  |
| ebi-a-GCST004131 | rs17656349 | T | C | 0.013 | 0.073  | 5 | 5.17E-09 | 34.199  |
| ebi-a-GCST004131 | rs6579807  | T | C | 0.019 | 0.125  | 5 | 4.01E-11 | 43.742  |
| ebi-a-GCST004131 | rs1445004  | T | C | 0.013 | 0.169  | 5 | 3.48E-40 | 176.869 |
| ebi-a-GCST004131 | rs62378712 | C | T | 0.014 | -0.078 | 5 | 4.23E-08 | 29.864  |
| ebi-a-GCST004131 | rs6873866  | C | T | 0.013 | -0.092 | 5 | 6.15E-13 | 51.548  |
| ebi-a-GCST004131 | rs10041497 | C | T | 0.013 | 0.082  | 5 | 1.95E-10 | 40.308  |
| ebi-a-GCST004131 | rs755374   | T | C | 0.013 | 0.177  | 5 | 1.59E-39 | 173.886 |
| ebi-a-GCST004131 | rs56235845 | G | T | 0.014 | 0.088  | 5 | 1.77E-10 | 40.387  |
| ebi-a-GCST004131 | rs11739135 | C | G | 0.013 | 0.137  | 5 | 1.10E-27 | 119.421 |
| ebi-a-GCST004131 | rs341295   | T | C | 0.012 | 0.070  | 5 | 1.45E-08 | 32.050  |
| ebi-a-GCST004131 | rs11152949 | G | A | 0.013 | 0.102  | 6 | 1.56E-14 | 58.701  |

|                  |             |   |   |       |        |    |          |         |
|------------------|-------------|---|---|-------|--------|----|----------|---------|
| ebi-a-GCST004131 | rs1267496   | C | G | 0.016 | 0.105  | 6  | 3.39E-11 | 43.859  |
| ebi-a-GCST004131 | rs145568234 | G | T | 0.048 | 0.860  | 6  | 4.73E-73 | 326.425 |
| ebi-a-GCST004131 | rs6457681   | T | G | 0.015 | -0.169 | 6  | 3.75E-28 | 121.576 |
| ebi-a-GCST004131 | rs4712528   | C | G | 0.015 | 0.104  | 6  | 7.14E-12 | 47.085  |
| ebi-a-GCST004131 | rs143210366 | G | T | 0.036 | 0.284  | 6  | 3.14E-15 | 62.059  |
| ebi-a-GCST004131 | rs62408218  | T | C | 0.013 | -0.082 | 6  | 2.40E-10 | 40.209  |
| ebi-a-GCST004131 | rs212402    | A | G | 0.013 | -0.074 | 6  | 1.06E-08 | 32.666  |
| ebi-a-GCST004131 | rs34140409  | T | C | 0.024 | -0.158 | 6  | 2.28E-11 | 44.613  |
| ebi-a-GCST004131 | rs6933404   | C | T | 0.015 | 0.086  | 6  | 6.64E-09 | 33.547  |
| ebi-a-GCST004131 | rs35171809  | G | A | 0.012 | 0.109  | 6  | 1.16E-18 | 78.243  |
| ebi-a-GCST004131 | rs10953551  | G | A | 0.013 | -0.103 | 7  | 4.94E-16 | 66.160  |
| ebi-a-GCST004131 | rs243505    | G | A | 0.013 | -0.081 | 7  | 3.04E-10 | 39.552  |
| ebi-a-GCST004131 | rs149169037 | A | G | 0.024 | -0.134 | 7  | 3.26E-08 | 30.569  |
| ebi-a-GCST004131 | rs1456896   | T | C | 0.013 | 0.088  | 7  | 4.50E-11 | 43.679  |
| ebi-a-GCST004131 | rs62482552  | A | G | 0.013 | -0.074 | 7  | 1.97E-08 | 31.651  |
| ebi-a-GCST004131 | rs11768365  | G | A | 0.015 | -0.084 | 7  | 3.88E-08 | 30.322  |
| ebi-a-GCST004131 | rs78771661  | T | C | 0.067 | -0.385 | 8  | 8.95E-09 | 33.084  |
| ebi-a-GCST004131 | rs4380956   | A | G | 0.013 | 0.091  | 8  | 1.12E-12 | 51.004  |
| ebi-a-GCST004131 | rs938650    | A | G | 0.019 | -0.107 | 8  | 1.41E-08 | 32.291  |
| ebi-a-GCST004131 | rs1887428   | C | G | 0.013 | -0.164 | 9  | 2.46E-36 | 157.301 |
| ebi-a-GCST004131 | rs10114470  | C | T | 0.014 | 0.148  | 9  | 4.10E-27 | 115.916 |
| ebi-a-GCST004131 | rs3829110   | G | A | 0.013 | 0.157  | 9  | 3.52E-36 | 158.558 |
| ebi-a-GCST004131 | rs1250573   | A | G | 0.014 | -0.098 | 10 | 1.11E-12 | 50.431  |
| ebi-a-GCST004131 | rs10826797  | T | G | 0.014 | -0.099 | 10 | 3.99E-13 | 52.990  |
| ebi-a-GCST004131 | rs6584282   | G | A | 0.012 | -0.152 | 10 | 1.19E-34 | 150.260 |
| ebi-a-GCST004131 | rs11195128  | T | C | 0.013 | 0.079  | 10 | 2.74E-09 | 35.461  |

|                  |             |   |   |       |        |    |          |         |
|------------------|-------------|---|---|-------|--------|----|----------|---------|
| ebi-a-GCST004131 | rs2384352   | G | A | 0.013 | 0.095  | 10 | 3.12E-13 | 52.701  |
| ebi-a-GCST004131 | rs10761659  | G | A | 0.013 | 0.159  | 10 | 2.30E-36 | 158.240 |
| ebi-a-GCST004131 | rs7918084   | T | C | 0.013 | 0.071  | 10 | 1.38E-08 | 32.262  |
| ebi-a-GCST004131 | rs111456533 | A | G | 0.017 | -0.103 | 10 | 1.18E-09 | 36.781  |
| ebi-a-GCST004131 | rs11221335  | C | T | 0.015 | 0.083  | 11 | 2.44E-08 | 31.224  |
| ebi-a-GCST004131 | rs11236797  | A | C | 0.013 | 0.149  | 11 | 7.19E-33 | 141.705 |
| ebi-a-GCST004131 | rs11066188  | A | G | 0.013 | 0.087  | 12 | 1.76E-11 | 45.200  |
| ebi-a-GCST004131 | rs117981694 | A | G | 0.041 | 0.345  | 12 | 4.53E-17 | 70.544  |
| ebi-a-GCST004131 | rs12825700  | A | G | 0.013 | 0.132  | 12 | 1.27E-25 | 108.685 |
| ebi-a-GCST004131 | rs3897234   | C | T | 0.015 | 0.097  | 13 | 1.90E-11 | 44.844  |
| ebi-a-GCST004131 | rs140933577 | C | T | 0.031 | -0.186 | 13 | 1.13E-09 | 37.070  |
| ebi-a-GCST004131 | rs194746    | T | C | 0.012 | 0.083  | 14 | 1.84E-11 | 45.128  |
| ebi-a-GCST004131 | rs3850378   | C | T | 0.021 | 0.154  | 14 | 1.10E-13 | 55.061  |
| ebi-a-GCST004131 | rs1864239   | G | A | 0.178 | 1.337  | 15 | 6.27E-14 | 56.258  |
| ebi-a-GCST004131 | rs56062135  | T | C | 0.015 | 0.138  | 15 | 1.37E-21 | 90.841  |
| ebi-a-GCST004131 | rs7190426   | C | A | 0.016 | -0.087 | 16 | 2.06E-08 | 31.650  |
| ebi-a-GCST004131 | rs28374519  | A | G | 0.014 | -0.111 | 16 | 6.55E-16 | 65.055  |
| ebi-a-GCST004131 | rs9934775   | T | C | 0.017 | -0.112 | 16 | 8.77E-11 | 42.099  |
| ebi-a-GCST004131 | rs8056255   | A | T | 0.033 | 0.277  | 16 | 2.99E-17 | 71.498  |
| ebi-a-GCST004131 | rs11548656  | G | A | 0.036 | -0.237 | 16 | 5.18E-11 | 43.008  |
| ebi-a-GCST004131 | rs749910    | A | G | 0.014 | 0.196  | 16 | 7.83E-46 | 201.928 |
| ebi-a-GCST004131 | rs2301127   | A | G | 0.013 | 0.078  | 16 | 4.96E-10 | 38.617  |
| ebi-a-GCST004131 | rs16940202  | C | T | 0.017 | 0.113  | 16 | 2.50E-11 | 44.708  |
| ebi-a-GCST004131 | rs12936409  | T | C | 0.012 | 0.141  | 17 | 7.73E-30 | 128.566 |
| ebi-a-GCST004131 | rs744166    | G | A | 0.013 | -0.111 | 17 | 1.34E-18 | 77.468  |
| ebi-a-GCST004131 | rs714910    | C | A | 0.014 | -0.096 | 17 | 6.23E-12 | 47.600  |

|                  |             |    |   |       |        |    |          |         |
|------------------|-------------|----|---|-------|--------|----|----------|---------|
| ebi-a-GCST004131 | rs113846785 | CG | C | 0.018 | -0.132 | 17 | 2.47E-13 | 53.696  |
| ebi-a-GCST004131 | rs1319951   | G  | C | 0.015 | -0.085 | 18 | 7.50E-09 | 33.514  |
| ebi-a-GCST004131 | rs80262450  | A  | G | 0.019 | 0.158  | 18 | 1.04E-16 | 69.240  |
| ebi-a-GCST004131 | rs4807569   | C  | A | 0.015 | 0.128  | 19 | 4.24E-17 | 71.025  |
| ebi-a-GCST004131 | rs7256518   | A  | G | 0.028 | -0.167 | 19 | 1.63E-09 | 36.392  |
| ebi-a-GCST004131 | rs62126610  | G  | A | 0.017 | 0.141  | 19 | 2.60E-17 | 71.841  |
| ebi-a-GCST004131 | rs11669299  | T  | C | 0.016 | -0.111 | 19 | 1.84E-12 | 49.716  |
| ebi-a-GCST004131 | rs6062496   | A  | G | 0.013 | 0.137  | 20 | 2.83E-26 | 112.788 |
| ebi-a-GCST004131 | rs4256018   | G  | T | 0.014 | 0.079  | 20 | 1.23E-08 | 32.440  |
| ebi-a-GCST004131 | rs6017342   | C  | A | 0.014 | 0.116  | 20 | 1.07E-17 | 73.324  |
| ebi-a-GCST004131 | rs6063502   | G  | A | 0.013 | -0.073 | 20 | 4.55E-08 | 30.004  |
| ebi-a-GCST004131 | rs154873    | A  | G | 0.013 | -0.081 | 20 | 7.38E-10 | 37.934  |
| ebi-a-GCST004131 | rs1297264   | G  | A | 0.013 | -0.146 | 21 | 3.98E-31 | 134.634 |
| ebi-a-GCST004131 | rs2836881   | T  | G | 0.015 | -0.164 | 21 | 1.96E-29 | 126.640 |
| ebi-a-GCST004131 | rs2838517   | C  | T | 0.013 | -0.128 | 21 | 1.83E-24 | 104.858 |
| ebi-a-GCST004131 | rs2413583   | T  | C | 0.017 | -0.173 | 22 | 4.60E-24 | 102.590 |
| ebi-a-GCST004131 | rs5754100   | C  | T | 0.016 | 0.129  | 22 | 7.14E-16 | 65.307  |
| ebi-a-GCST004131 | rs5763793   | T  | G | 0.013 | 0.073  | 22 | 1.47E-08 | 31.879  |

(2)

| ID               | SNP        | Effect_allele | Other_allele | Se    | Beta   | Chr | P_val    | F       |
|------------------|------------|---------------|--------------|-------|--------|-----|----------|---------|
| ebi-a-GCST004133 | rs7544646  | G             | C            | 0.016 | -0.117 | 1   | 2.53E-13 | 53.290  |
| ebi-a-GCST004133 | rs3024493  | A             | C            | 0.021 | 0.210  | 1   | 7.46E-24 | 100.959 |
| ebi-a-GCST004133 | rs3820330  | A             | C            | 0.018 | -0.159 | 1   | 3.91E-19 | 79.490  |
| ebi-a-GCST004133 | rs11209026 | A             | G            | 0.036 | -0.483 | 1   | 1.99E-41 | 182.024 |
| ebi-a-GCST004133 | rs6658353  | C             | G            | 0.016 | -0.157 | 1   | 1.17E-22 | 96.163  |

|                  |             |   |   |       |        |   |          |         |
|------------------|-------------|---|---|-------|--------|---|----------|---------|
| ebi-a-GCST004133 | rs7554511   | A | C | 0.018 | -0.145 | 1 | 4.27E-16 | 66.175  |
| ebi-a-GCST004133 | rs7523335   | A | G | 0.021 | -0.139 | 1 | 3.42E-11 | 43.749  |
| ebi-a-GCST004133 | rs2816954   | A | T | 0.023 | 0.138  | 1 | 1.80E-09 | 36.052  |
| ebi-a-GCST004133 | rs1317209   | A | G | 0.020 | 0.182  | 1 | 2.90E-19 | 80.204  |
| ebi-a-GCST004133 | rs79051659  | A | G | 0.026 | 0.161  | 1 | 1.30E-09 | 36.961  |
| ebi-a-GCST004133 | rs4654925   | C | G | 0.016 | -0.222 | 1 | 2.61E-44 | 194.418 |
| ebi-a-GCST004133 | rs7608697   | C | A | 0.016 | 0.160  | 2 | 3.03E-23 | 98.392  |
| ebi-a-GCST004133 | rs55905347  | A | G | 0.017 | 0.105  | 2 | 2.09E-10 | 40.315  |
| ebi-a-GCST004133 | rs62180181  | T | C | 0.017 | 0.123  | 2 | 8.08E-13 | 51.403  |
| ebi-a-GCST004133 | rs4676408   | A | G | 0.017 | 0.143  | 2 | 1.19E-17 | 73.631  |
| ebi-a-GCST004133 | rs1811711   | G | C | 0.022 | -0.130 | 2 | 6.09E-09 | 33.932  |
| ebi-a-GCST004133 | rs1131095   | C | T | 0.017 | 0.159  | 3 | 2.18E-21 | 89.911  |
| ebi-a-GCST004133 | rs755374    | T | C | 0.017 | 0.171  | 5 | 9.73E-24 | 100.468 |
| ebi-a-GCST004133 | rs72704802  | T | C | 0.021 | -0.122 | 5 | 2.89E-09 | 35.247  |
| ebi-a-GCST004133 | rs17715902  | A | G | 0.017 | 0.097  | 5 | 4.62E-09 | 34.427  |
| ebi-a-GCST004133 | rs6889364   | A | G | 0.023 | 0.132  | 5 | 7.87E-09 | 33.417  |
| ebi-a-GCST004133 | rs17656349  | T | C | 0.016 | 0.090  | 5 | 1.54E-08 | 32.040  |
| ebi-a-GCST004133 | rs67111717  | G | A | 0.017 | 0.094  | 5 | 3.27E-08 | 30.476  |
| ebi-a-GCST004133 | rs9260809   | G | A | 0.018 | -0.110 | 6 | 1.96E-09 | 35.870  |
| ebi-a-GCST004133 | rs9267798   | C | G | 0.028 | 0.249  | 6 | 6.54E-19 | 78.829  |
| ebi-a-GCST004133 | rs9271176   | G | A | 0.017 | -0.350 | 6 | 4.20E-91 | 408.133 |
| ebi-a-GCST004133 | rs28383224  | G | A | 0.017 | -0.147 | 6 | 4.65E-19 | 79.156  |
| ebi-a-GCST004133 | rs3734851   | A | G | 0.058 | 0.503  | 6 | 6.58E-18 | 74.273  |
| ebi-a-GCST004133 | rs13200059  | A | G | 0.044 | 0.294  | 6 | 1.48E-11 | 45.593  |
| ebi-a-GCST004133 | rs6933404   | C | T | 0.019 | 0.149  | 6 | 2.69E-15 | 62.477  |
| ebi-a-GCST004133 | rs113986290 | T | C | 0.053 | -0.307 | 6 | 7.59E-09 | 33.339  |

|                  |             |    |   |       |        |    |          |         |
|------------------|-------------|----|---|-------|--------|----|----------|---------|
| ebi-a-GCST004133 | rs798506    | C  | T | 0.018 | -0.121 | 7  | 1.47E-11 | 45.393  |
| ebi-a-GCST004133 | rs4728142   | A  | G | 0.016 | 0.100  | 7  | 3.23E-10 | 39.658  |
| ebi-a-GCST004133 | rs989960    | T  | C | 0.016 | -0.121 | 7  | 3.28E-14 | 57.570  |
| ebi-a-GCST004133 | rs10272963  | T  | C | 0.016 | -0.151 | 7  | 4.11E-21 | 89.303  |
| ebi-a-GCST004133 | rs1887428   | C  | G | 0.017 | -0.167 | 9  | 9.65E-24 | 101.208 |
| ebi-a-GCST004133 | rs10817678  | A  | G | 0.017 | 0.133  | 9  | 4.42E-15 | 61.392  |
| ebi-a-GCST004133 | rs3812565   | C  | T | 0.016 | 0.134  | 9  | 6.50E-17 | 69.618  |
| ebi-a-GCST004133 | rs10761659  | G  | A | 0.016 | 0.128  | 10 | 1.33E-15 | 63.601  |
| ebi-a-GCST004133 | rs7911117   | G  | T | 0.024 | -0.134 | 10 | 1.84E-08 | 31.529  |
| ebi-a-GCST004133 | rs7911680   | C  | A | 0.016 | -0.153 | 10 | 6.71E-22 | 91.991  |
| ebi-a-GCST004133 | rs2212434   | T  | C | 0.016 | 0.125  | 11 | 2.80E-15 | 62.003  |
| ebi-a-GCST004133 | rs2045241   | A  | G | 0.017 | -0.106 | 11 | 2.83E-10 | 39.563  |
| ebi-a-GCST004133 | rs12825700  | A  | G | 0.016 | 0.189  | 12 | 7.33E-32 | 137.661 |
| ebi-a-GCST004133 | rs1359946   | A  | G | 0.020 | 0.157  | 13 | 6.58E-15 | 60.485  |
| ebi-a-GCST004133 | rs56062135  | T  | C | 0.018 | 0.108  | 15 | 4.66E-09 | 34.324  |
| ebi-a-GCST004133 | rs11645239  | G  | C | 0.020 | -0.117 | 16 | 4.14E-09 | 34.457  |
| ebi-a-GCST004133 | rs7203363   | A  | T | 0.019 | 0.107  | 16 | 1.41E-08 | 32.111  |
| ebi-a-GCST004133 | rs16940186  | C  | T | 0.021 | 0.136  | 16 | 2.18E-10 | 40.210  |
| ebi-a-GCST004133 | rs113846785 | CG | C | 0.023 | -0.163 | 17 | 1.15E-12 | 50.478  |
| ebi-a-GCST004133 | rs12936409  | T  | C | 0.016 | 0.137  | 17 | 5.62E-18 | 74.636  |
| ebi-a-GCST004133 | rs11651246  | G  | T | 0.022 | 0.147  | 17 | 2.01E-11 | 45.055  |
| ebi-a-GCST004133 | rs10408351  | A  | G | 0.020 | 0.155  | 19 | 2.92E-14 | 57.581  |
| ebi-a-GCST004133 | rs78064630  | A  | G | 0.031 | 0.176  | 19 | 1.08E-08 | 32.616  |
| ebi-a-GCST004133 | rs6062496   | A  | G | 0.016 | 0.136  | 20 | 8.97E-17 | 69.513  |
| ebi-a-GCST004133 | rs6017342   | C  | A | 0.017 | 0.194  | 20 | 3.95E-30 | 130.766 |
| ebi-a-GCST004133 | rs2836881   | T  | G | 0.019 | -0.222 | 21 | 1.11E-32 | 142.071 |

|                  |           |   |   |       |        |    |          |        |
|------------------|-----------|---|---|-------|--------|----|----------|--------|
| ebi-a-GCST004133 | rs2838517 | C | T | 0.016 | -0.118 | 21 | 1.78E-13 | 54.114 |
| ebi-a-GCST004133 | rs1736161 | A | G | 0.016 | -0.123 | 21 | 2.22E-14 | 58.081 |
| ebi-a-GCST004133 | rs9611131 | C | T | 0.023 | -0.149 | 22 | 5.11E-11 | 43.316 |
| ebi-a-GCST004133 | rs4993442 | T | G | 0.018 | -0.099 | 22 | 3.54E-08 | 30.465 |
| ebi-a-GCST004133 | rs137845  | G | A | 0.016 | 0.101  | 22 | 1.50E-10 | 40.944 |

(3)

| ID               | SNP         | Effect_allele | Other_allele | Se    | Beta   | Chr | P_val    | F       |
|------------------|-------------|---------------|--------------|-------|--------|-----|----------|---------|
| ebi-a-GCST004132 | rs12131079  | T             | C            | 0.017 | -0.109 | 1   | 3.99E-10 | 39.098  |
| ebi-a-GCST004132 | rs35730213  | C             | G            | 0.018 | -0.117 | 1   | 1.17E-10 | 41.499  |
| ebi-a-GCST004132 | rs3122605   | A             | G            | 0.023 | -0.175 | 1   | 1.24E-14 | 59.297  |
| ebi-a-GCST004132 | rs114802258 | T             | C            | 0.038 | -0.225 | 1   | 5.11E-09 | 34.180  |
| ebi-a-GCST004132 | rs4316387   | C             | T            | 0.019 | -0.129 | 1   | 7.74E-12 | 46.731  |
| ebi-a-GCST004132 | rs6679677   | A             | C            | 0.029 | -0.228 | 1   | 1.77E-15 | 63.275  |
| ebi-a-GCST004132 | rs6704109   | T             | C            | 0.018 | 0.175  | 1   | 5.10E-22 | 93.267  |
| ebi-a-GCST004132 | rs7517847   | G             | T            | 0.017 | -0.345 | 1   | 5.84E-97 | 436.430 |
| ebi-a-GCST004132 | rs11378157  | AG            | A            | 0.019 | -0.138 | 2   | 9.29E-14 | 55.321  |
| ebi-a-GCST004132 | rs11683692  | C             | T            | 0.038 | -0.214 | 2   | 1.75E-08 | 31.833  |
| ebi-a-GCST004132 | rs4343432   | G             | A            | 0.016 | 0.112  | 2   | 3.50E-12 | 48.054  |
| ebi-a-GCST004132 | rs11677002  | C             | T            | 0.016 | -0.112 | 2   | 4.57E-12 | 47.551  |
| ebi-a-GCST004132 | rs34004493  | G             | A            | 0.018 | 0.126  | 2   | 2.00E-12 | 49.392  |
| ebi-a-GCST004132 | rs3816234   | A             | G            | 0.016 | 0.270  | 2   | 1.51E-62 | 278.601 |
| ebi-a-GCST004132 | rs55946629  | A             | C            | 0.023 | 0.176  | 2   | 2.85E-14 | 57.721  |
| ebi-a-GCST004132 | rs7608697   | C             | A            | 0.016 | 0.123  | 2   | 4.03E-14 | 56.850  |
| ebi-a-GCST004132 | rs6740847   | G             | A            | 0.016 | -0.104 | 2   | 9.72E-11 | 41.727  |
| ebi-a-GCST004132 | rs1583792   | T             | C            | 0.016 | -0.088 | 2   | 3.26E-08 | 30.388  |



|                  |             |   |   |       |        |   |          |         |
|------------------|-------------|---|---|-------|--------|---|----------|---------|
| ebi-a-GCST004132 | rs56116661  | T | C | 0.021 | -0.131 | 3 | 5.67E-10 | 38.300  |
| ebi-a-GCST004132 | rs6808936   | G | A | 0.016 | 0.090  | 3 | 1.93E-08 | 31.527  |
| ebi-a-GCST004132 | rs9836291   | A | G | 0.017 | 0.172  | 3 | 3.77E-24 | 102.605 |
| ebi-a-GCST004132 | rs2581828   | G | C | 0.016 | -0.094 | 3 | 6.46E-09 | 33.740  |
| ebi-a-GCST004132 | rs73243877  | G | A | 0.021 | 0.116  | 4 | 4.12E-08 | 30.146  |
| ebi-a-GCST004132 | rs13107325  | T | C | 0.028 | 0.201  | 4 | 1.66E-12 | 49.891  |
| ebi-a-GCST004132 | rs62324212  | A | C | 0.016 | 0.106  | 4 | 8.02E-11 | 42.290  |
| ebi-a-GCST004132 | rs6579807   | T | C | 0.024 | 0.199  | 5 | 3.44E-16 | 66.717  |
| ebi-a-GCST004132 | rs755374    | T | C | 0.017 | 0.197  | 5 | 1.38E-29 | 128.054 |
| ebi-a-GCST004132 | rs6451494   | C | T | 0.017 | 0.261  | 5 | 8.26E-56 | 246.263 |
| ebi-a-GCST004132 | rs112856973 | C | T | 0.024 | -0.161 | 5 | 3.61E-11 | 44.007  |
| ebi-a-GCST004132 | rs6873866   | C | T | 0.016 | -0.131 | 5 | 1.35E-15 | 64.195  |
| ebi-a-GCST004132 | rs2188962   | T | C | 0.016 | 0.200  | 5 | 5.59E-36 | 156.876 |
| ebi-a-GCST004132 | rs181826    | A | C | 0.017 | 0.116  | 5 | 3.24E-12 | 48.415  |
| ebi-a-GCST004132 | rs1012636   | T | G | 0.020 | 0.129  | 6 | 7.01E-11 | 42.513  |
| ebi-a-GCST004132 | rs1321859   | T | C | 0.017 | -0.105 | 6 | 1.18E-09 | 37.196  |
| ebi-a-GCST004132 | rs73516754  | C | A | 0.017 | 0.142  | 6 | 4.04E-17 | 70.898  |
| ebi-a-GCST004132 | rs35171809  | G | A | 0.016 | 0.157  | 6 | 9.07E-23 | 97.004  |
| ebi-a-GCST004132 | rs111281598 | C | T | 0.032 | 0.275  | 6 | 4.17E-18 | 75.459  |
| ebi-a-GCST004132 | rs6941902   | C | T | 0.027 | 0.163  | 6 | 2.39E-09 | 35.649  |
| ebi-a-GCST004132 | rs7753014   | G | C | 0.016 | -0.099 | 6 | 1.39E-09 | 36.814  |
| ebi-a-GCST004132 | rs145568234 | G | T | 0.063 | 0.860  | 6 | 4.31E-42 | 184.668 |
| ebi-a-GCST004132 | rs9482770   | C | T | 0.016 | 0.099  | 6 | 1.01E-09 | 37.120  |
| ebi-a-GCST004132 | rs9501641   | T | C | 0.043 | 0.303  | 6 | 2.57E-12 | 49.097  |
| ebi-a-GCST004132 | rs9258357   | C | T | 0.022 | -0.118 | 6 | 5.00E-08 | 29.793  |
| ebi-a-GCST004132 | rs212409    | A | G | 0.016 | -0.110 | 6 | 1.49E-11 | 45.771  |

|                  |            |   |   |       |        |    |           |         |
|------------------|------------|---|---|-------|--------|----|-----------|---------|
| ebi-a-GCST004132 | rs9656588  | C | T | 0.017 | 0.118  | 7  | 8.73E-12  | 46.760  |
| ebi-a-GCST004132 | rs938650   | A | G | 0.025 | -0.175 | 8  | 1.65E-12  | 50.026  |
| ebi-a-GCST004132 | rs4380956  | A | G | 0.017 | 0.132  | 8  | 1.15E-15  | 64.000  |
| ebi-a-GCST004132 | rs79832570 | C | T | 0.034 | 0.223  | 8  | 8.90E-11  | 42.174  |
| ebi-a-GCST004132 | rs10114470 | C | T | 0.018 | 0.169  | 9  | 1.76E-21  | 90.841  |
| ebi-a-GCST004132 | rs1887428  | C | G | 0.017 | -0.166 | 9  | 8.54E-23  | 96.481  |
| ebi-a-GCST004132 | rs4077515  | T | C | 0.016 | 0.185  | 9  | 3.14E-30  | 130.129 |
| ebi-a-GCST004132 | rs10884966 | A | G | 0.017 | 0.113  | 10 | 4.13E-11  | 43.745  |
| ebi-a-GCST004132 | rs61839660 | T | C | 0.026 | 0.147  | 10 | 1.98E-08  | 31.635  |
| ebi-a-GCST004132 | rs2002695  | G | A | 0.019 | -0.129 | 10 | 8.31E-12  | 46.803  |
| ebi-a-GCST004132 | rs10822050 | C | T | 0.016 | 0.183  | 10 | 2.35E-29  | 127.188 |
| ebi-a-GCST004132 | rs2675670  | C | G | 0.016 | 0.107  | 10 | 2.89E-11  | 44.500  |
| ebi-a-GCST004132 | rs1148246  | T | C | 0.017 | -0.132 | 10 | 2.09E-15  | 62.761  |
| ebi-a-GCST004132 | rs1250573  | A | G | 0.018 | -0.152 | 10 | 1.92E-17  | 72.297  |
| ebi-a-GCST004132 | rs6584282  | G | A | 0.016 | -0.166 | 10 | 3.44E-25  | 107.381 |
| ebi-a-GCST004132 | rs11236797 | A | C | 0.016 | 0.176  | 11 | 8.51E-28  | 119.502 |
| ebi-a-GCST004132 | rs28999107 | T | G | 0.018 | 0.108  | 12 | 1.06E-09  | 37.018  |
| ebi-a-GCST004132 | rs77566919 | A | G | 0.019 | -0.109 | 12 | 4.13E-09  | 34.651  |
| ebi-a-GCST004132 | rs34635748 | T | C | 0.050 | 0.479  | 12 | 1.95E-21  | 90.476  |
| ebi-a-GCST004132 | rs1373904  | G | A | 0.019 | 0.141  | 13 | 9.11E-14  | 55.656  |
| ebi-a-GCST004132 | rs194746   | T | C | 0.016 | 0.098  | 14 | 1.24E-09  | 36.674  |
| ebi-a-GCST004132 | rs3850378  | C | T | 0.027 | 0.199  | 14 | 8.31E-14  | 55.550  |
| ebi-a-GCST004132 | rs72743461 | A | C | 0.019 | 0.168  | 15 | 2.26E-19  | 81.096  |
| ebi-a-GCST004132 | rs2021511  | T | C | 0.018 | -0.108 | 16 | 2.63E-09  | 35.344  |
| ebi-a-GCST004132 | rs42861    | G | A | 0.017 | 0.124  | 16 | 8.87E-14  | 55.400  |
| ebi-a-GCST004132 | rs2076756  | G | A | 0.017 | 0.385  | 16 | 1.80E-108 | 489.579 |

|                  |             |   |   |       |        |    |          |         |
|------------------|-------------|---|---|-------|--------|----|----------|---------|
| ebi-a-GCST004132 | rs7195228   | G | C | 0.021 | -0.133 | 16 | 2.09E-10 | 40.313  |
| ebi-a-GCST004132 | rs72798422  | C | T | 0.038 | 0.550  | 16 | 6.05E-47 | 206.923 |
| ebi-a-GCST004132 | rs10492862  | A | C | 0.018 | 0.107  | 16 | 1.26E-09 | 36.754  |
| ebi-a-GCST004132 | rs2948542   | G | A | 0.016 | 0.102  | 17 | 5.15E-10 | 38.852  |
| ebi-a-GCST004132 | rs714910    | C | A | 0.018 | -0.153 | 17 | 2.49E-17 | 71.547  |
| ebi-a-GCST004132 | rs12936409  | T | C | 0.016 | 0.143  | 17 | 4.31E-19 | 79.433  |
| ebi-a-GCST004132 | rs744166    | G | A | 0.016 | -0.114 | 17 | 1.80E-12 | 49.694  |
| ebi-a-GCST004132 | rs80262450  | A | G | 0.024 | 0.227  | 18 | 1.34E-20 | 86.399  |
| ebi-a-GCST004132 | rs144309607 | T | C | 0.047 | -0.371 | 19 | 2.69E-15 | 62.376  |
| ebi-a-GCST004132 | rs62126620  | A | G | 0.020 | 0.144  | 19 | 8.61E-13 | 51.325  |
| ebi-a-GCST004132 | rs4807570   | A | G | 0.019 | 0.181  | 19 | 6.03E-21 | 88.049  |
| ebi-a-GCST004132 | rs492602    | G | A | 0.016 | 0.108  | 19 | 2.33E-11 | 44.774  |
| ebi-a-GCST004132 | rs6062496   | A | G | 0.017 | 0.122  | 20 | 2.62E-13 | 53.632  |
| ebi-a-GCST004132 | rs3761158   | A | G | 0.017 | -0.110 | 20 | 2.65E-11 | 44.283  |
| ebi-a-GCST004132 | rs1297264   | G | A | 0.016 | -0.177 | 21 | 1.59E-27 | 117.782 |
| ebi-a-GCST004132 | rs2284553   | G | A | 0.017 | 0.128  | 21 | 1.14E-14 | 59.898  |
| ebi-a-GCST004132 | rs2838517   | C | T | 0.016 | -0.146 | 21 | 2.03E-19 | 80.778  |
| ebi-a-GCST004132 | rs2143178   | C | T | 0.022 | -0.209 | 22 | 6.84E-21 | 87.586  |
| ebi-a-GCST004132 | rs5754100   | C | T | 0.021 | 0.169  | 22 | 3.02E-16 | 67.065  |

---
