# Supplementary material for: Causal Link between Inflammatory Bowel Disease and Fistula: Evidence from Mendelian Randomization Study
Source: MDPI journal article supplement (doi:10.3390/jcm12072482), 2023-03-24
Supplement: s1 [file s1]

| Data         | ID           | Classification of diseases                       |
|--------------|--------------|--------------------------------------------------|
| FISTULA      | ICD-10 K31.6 | Gastric and duodenal fistula                     |
|              | ICD-10 K38.3 | Appendiceal fistula                              |
|              | ICD-10 K60   | Fissure and fistula of anal and rectal regions   |
|              | ICD-10 N32.1 | Bladder fistula                                  |
|              | ICD-10 N82.2 | A fistula from the vagina to the small intestine |
|              | ICD-10 N82.3 | A fistula from the vagina to the large intestine |
|              | ICD-10 N82.4 | Other female entero-genital fistulas             |
|              | ICD-9 537.4  | Fistula of stomach or duodenum                   |
|              | ICD-9 565    | Anal fissure and fistula                         |
|              | ICD-8 565    | Anal fissure and fistula                         |
|              | ICD-8 54302  | Other diseases of appendix                       |
| FISSANAL     | ICD-10 K60   | Fissure and fistula of anal and rectal regions   |
| FEMGENFISTUL | ICD-10 N82   | Fistula involving female genital tract           |
