# Supplementary material for: Causal Link between Inflammatory Bowel Disease and Fistula: Evidence from Mendelian Randomization Study
Source: MDPI journal article supplement (doi:10.3390/jcm12072482), 2023-03-24
Supplement: s1 [file s1]

| Variable            | Outcome                   |      |                     |          |                       |                    |           |
|---------------------|---------------------------|------|---------------------|----------|-----------------------|--------------------|-----------|
|                     | Method                    | NSNP | OR (95% CI)         | P_val    | Heterogeneity p-value | Pleiotropy p-value | Mr_presso |
| IBD to FISTULA      | MR Egger                  | 94   | 1.10 (1.00 to 1.21) | 0.0481   | 0.1937                | 0.8636             | 0.2237    |
|                     | Weighted median           | 94   | 1.10 (1.04 to 1.16) | 0.0006   |                       |                    |           |
|                     | Inverse variance weighted | 94   | 1.09 (1.05 to 1.13) | 1.22E-06 |                       |                    |           |
| IBD to FISSANAL     | MR Egger                  | 94   | 1.12 (1.02 to 1.23) | 0.0172   | 0.4448                | 0.6907             | 0.4804    |
|                     | Weighted median           | 94   | 1.11 (1.05 to 1.17) | 0.0001   |                       |                    |           |
|                     | Inverse variance weighted | 94   | 1.10 (1.06 to 1.14) | 6.12E-08 |                       |                    |           |
| IBD to FEMGENFISTUL | MR Egger                  | 95   | 0.93 (0.75 to 1.16) | 0.5359   | 0.8149                | 0.6484             | 0.8321    |
|                     | Weighted median           | 95   | 0.95 (0.75 to 1.21) | 0.6867   |                       |                    |           |
|                     | Inverse variance weighted | 95   | 0.97 (0.85 to 1.11) | 0.6688   |                       |                    |           |
| CD to FISTULA       | MR Egger                  | 76   | 1.03 (0.94 to 1.12) | 0.5541   | 0.0093                | 0.3006             | 0.0113    |
|                     | Weighted median           | 76   | 1.09 (1.04 to 1.13) | 0.0001   |                       |                    |           |
|                     | Inverse variance weighted | 76   | 1.07 (1.04 to 1.11) | 3.13E-05 |                       |                    |           |
| CD to FISSANAL      | MR Egger                  | 76   | 1.02 (0.93 to 1.11) | 0.6984   | 0.0142                | 0.1921             | 0.0116    |
|                     | Weighted median           | 76   | 1.07 (1.02 to 1.12) | 0.0042   |                       |                    |           |
|                     | Inverse variance weighted | 76   | 1.08 (1.04 to 1.11) | 1.89E-05 |                       |                    |           |
| CD to FEMGENFISTUL  | MR Egger                  | 76   | 1.01 (0.72 to 1.41) | 0.9660   | 0.4885                | 0.8891             | 0.5138    |

|                    |                           |    |                     |          |        |        |        |
|--------------------|---------------------------|----|---------------------|----------|--------|--------|--------|
|                    | Weighted median           | 76 | 0.93 (0.76 to 1.14) | 0.4856   |        |        |        |
|                    | Inverse variance weighted | 76 | 0.99 (0.87 to 1.12) | 0.8163   |        |        |        |
| UC to FISTULA      |                           |    |                     |          |        |        |        |
|                    | MR Egger                  | 50 | 1.07 (0.93 to 1.23) | 0.3350   | 0.2946 | 0.8919 | 0.3340 |
|                    | Weighted median           | 50 | 1.07 (1.01 to 1.13) | 0.0247   |        |        |        |
|                    | Inverse variance weighted | 50 | 1.08 (1.04 to 1.12) | 0.0001   |        |        |        |
| UC to FISSANAL     |                           |    |                     |          |        |        |        |
|                    | MR Egger                  | 50 | 1.11 (0.97 to 1.27) | 0.1278   | 0.4213 | 0.8316 | 0.4686 |
|                    | Weighted median           | 50 | 1.10 (1.04 to 1.17) | 0.0014   |        |        |        |
|                    | Inverse variance weighted | 50 | 1.10 (1.06 to 1.14) | 2.75E-06 |        |        |        |
| UC to FEMGENFISTUL |                           |    |                     |          |        |        |        |
|                    | MR Egger                  | 51 | 0.64 (0.39 to 1.04) | 0.0794   | 0.2497 | 0.1309 | 0.2178 |
|                    | Weighted median           | 51 | 0.80 (0.61 to 1.03) | 0.0844   |        |        |        |
|                    | Inverse variance weighted | 51 | 0.92 (0.77 to 1.09) | 0.3159   |        |        |        |

---
