# Supplementary material for: Causal Link between Inflammatory Bowel Disease and Fistula: Evidence from Mendelian Randomization Study
Source: MDPI journal article supplement (doi:10.3390/jcm12072482), 2023-03-24
Supplement: s1 [file s1]

**Supplementary table S3. (1) SNPs related to FISTULA; (2) 2 SNPs related to FISSANAL; (3) SNPs related to FEMGENFISTUL.**

| (1)                |             |               |              |        |         |     |          |       |
|--------------------|-------------|---------------|--------------|--------|---------|-----|----------|-------|
| ID                 | SNP         | Effect_allele | Other_allele | Se     | Beta    | Chr | P_val    | F     |
| finn-b-K11_FISTULA | rs10160633  | G             | A            | 0.0802 | -0.378  | 11  | 2.41E-06 | 22.21 |
| finn-b-K11_FISTULA | rs10889022  | T             | C            | 0.025  | 0.1529  | 1   | 9.19E-10 | 37.41 |
| finn-b-K11_FISTULA | rs12961069  | T             | C            | 0.0255 | 0.1172  | 18  | 4.41E-06 | 21.12 |
| finn-b-K11_FISTULA | rs13192019  | C             | T            | 0.2569 | 1.2612  | 6   | 9.12E-07 | 24.10 |
| finn-b-K11_FISTULA | rs138578962 | T             | C            | 0.054  | 0.2647  | 19  | 9.51E-07 | 24.03 |
| finn-b-K11_FISTULA | rs147730261 | A             | C            | 0.2168 | 1.0464  | 15  | 1.39E-06 | 23.30 |
| finn-b-K11_FISTULA | rs17769930  | T             | C            | 0.0841 | 0.3882  | 12  | 3.93E-06 | 21.31 |
| finn-b-K11_FISTULA | rs2634736   | T             | C            | 0.0368 | -0.1913 | 3   | 2.01E-07 | 27.02 |
| finn-b-K11_FISTULA | rs2701111   | A             | G            | 0.0215 | 0.1071  | 12  | 6.15E-07 | 24.81 |
| finn-b-K11_FISTULA | rs2735178   | C             | T            | 0.0273 | -0.1265 | 7   | 3.43E-06 | 21.47 |
| finn-b-K11_FISTULA | rs34831382  | G             | A            | 0.0462 | 0.212   | 2   | 4.54E-06 | 21.06 |
| finn-b-K11_FISTULA | rs35586534  | G             | A            | 0.0328 | -0.1531 | 2   | 2.96E-06 | 21.79 |
| finn-b-K11_FISTULA | rs577384250 | A             | G            | 0.0891 | 0.4334  | 10  | 1.16E-06 | 23.66 |
| finn-b-K11_FISTULA | rs6124783   | A             | G            | 0.0258 | 0.1287  | 20  | 5.91E-07 | 24.88 |
| finn-b-K11_FISTULA | rs61271555  | A             | G            | 0.0277 | 0.1322  | 11  | 1.85E-06 | 22.78 |
| finn-b-K11_FISTULA | rs62506936  | A             | G            | 0.0535 | -0.255  | 8   | 1.89E-06 | 22.72 |
| finn-b-K11_FISTULA | rs6455970   | G             | A            | 0.0265 | -0.1231 | 6   | 3.35E-06 | 21.58 |
| finn-b-K11_FISTULA | rs72791105  | T             | G            | 0.0937 | 0.4338  | 2   | 3.71E-06 | 21.43 |
| finn-b-K11_FISTULA | rs8074474   | A             | C            | 0.0496 | 0.2381  | 17  | 1.58E-06 | 23.04 |
| finn-b-K11_FISTULA | rs9827246   | T             | C            | 0.022  | 0.1028  | 3   | 2.91E-06 | 21.83 |

---

(2)

| ID                  | SNP         | Effect_allele | Other_allele | Se     | Beta    | Chr | P_val    | F     |
|---------------------|-------------|---------------|--------------|--------|---------|-----|----------|-------|
| finn-b-K11_FISSANAL | rs10889022  | T             | C            | 0.0256 | 0.1592  | 1   | 5.20E-10 | 38.67 |
| finn-b-K11_FISSANAL | rs11102109  | C             | A            | 0.0239 | -0.1108 | 1   | 3.70E-06 | 21.49 |
| finn-b-K11_FISSANAL | rs13187132  | T             | C            | 0.0318 | -0.1466 | 5   | 3.93E-06 | 21.25 |
| finn-b-K11_FISSANAL | rs13192019  | C             | T            | 0.2636 | 1.3107  | 6   | 6.61E-07 | 24.72 |
| finn-b-K11_FISSANAL | rs138578962 | T             | C            | 0.0557 | 0.2764  | 19  | 6.87E-07 | 24.62 |
| finn-b-K11_FISSANAL | rs17769930  | T             | C            | 0.0859 | 0.3947  | 12  | 4.33E-06 | 21.11 |
| finn-b-K11_FISSANAL | rs2634736   | T             | C            | 0.0377 | -0.1895 | 3   | 4.87E-07 | 25.27 |
| finn-b-K11_FISSANAL | rs2701111   | A             | G            | 0.022  | 0.1118  | 12  | 3.77E-07 | 25.82 |
| finn-b-K11_FISSANAL | rs55987116  | A             | C            | 0.0268 | 0.1385  | 20  | 2.33E-07 | 26.71 |
| finn-b-K11_FISSANAL | rs577384250 | A             | G            | 0.092  | 0.4552  | 10  | 7.52E-07 | 24.48 |
| finn-b-K11_FISSANAL | rs61271555  | A             | G            | 0.0284 | 0.1305  | 11  | 4.34E-06 | 21.11 |
| finn-b-K11_FISSANAL | rs62506936  | A             | G            | 0.0549 | -0.2696 | 8   | 9.17E-07 | 24.12 |
| finn-b-K11_FISSANAL | rs6455970   | G             | A            | 0.0271 | -0.1242 | 6   | 4.74E-06 | 21.00 |
| finn-b-K11_FISSANAL | rs8074474   | A             | C            | 0.0509 | 0.2447  | 17  | 1.53E-06 | 23.11 |
| finn-b-K11_FISSANAL | rs9827246   | T             | C            | 0.0225 | 0.1032  | 3   | 4.70E-06 | 21.04 |

(3)

| ID                      | SNP         | Effect_allele | Other_allele | Se     | Beta    | Chr | P_val    | F     |
|-------------------------|-------------|---------------|--------------|--------|---------|-----|----------|-------|
| finn-b-N14_FEMGENFISTUL | rs10944369  | T             | C            | 0.0977 | -0.4834 | 6   | 7.48E-07 | 24.48 |
| finn-b-N14_FEMGENFISTUL | rs11005954  | C             | T            | 0.2293 | 1.0513  | 10  | 4.52E-06 | 21.02 |
| finn-b-N14_FEMGENFISTUL | rs142466907 | C             | T            | 0.8182 | 4.1592  | 2   | 3.71E-07 | 25.84 |
| finn-b-N14_FEMGENFISTUL | rs17160688  | A             | G            | 0.1693 | 0.8171  | 1   | 1.39E-06 | 23.29 |

|                         |           |   |   |        |         |    |          |       |
|-------------------------|-----------|---|---|--------|---------|----|----------|-------|
| finn-b-N14_FEMGENFISTUL | rs7765706 | T | C | 0.1001 | -0.5447 | 6  | 5.33E-08 | 29.61 |
| finn-b-N14_FEMGENFISTUL | rs7961226 | C | T | 0.1537 | 0.713   | 12 | 3.47E-06 | 21.52 |

---
