# Supplementary material for: Causal Link between Inflammatory Bowel Disease and Fistula: Evidence from Mendelian Randomization Study
Source: J Clin Med. 2023 Mar 24;12(7):2482. doi: 10.3390/jcm12072482 (PMC10095427; doi:10.3390/jcm12072482)
Supplement: Supplementary file 1 [file jcm-12-02482-s001.zip]

Archive with 10 entries (10 files):
- Supplementary Figure S1.tif
- Supplementary Figure S2.tif
- Supplementary Figure S3.tif
- Supplementary Figure S4.tif
- Supplementary materials.pdf
- Supplementary table S1.pdf
- Supplementary table S2.pdf
- Supplementary table S3.pdf
- Supplementary table S4.pdf
- Supplementary table S5 .pdf
